# Supplementary material for: Adverse childhood experiences are associated with the risk of lung cancer: a prospective cohort study
Source: Springer Nature journal article supplement (doi:10.1186/1471-2458-10-20), 2010-01-19

**Figure 2. Frequency, age-adjusted risk, and risk ratio of the occurrence of lung cancer, identified by hospital discharge records, between baseline and 31 December 2005 by number of categories of adverse childhood experiences (ACEs) and smoking status among 15,365 adults. Confidence interval functions displayed for the risk ratio comparing the occurrence of lung cancer across the number of categories of ACEs**

| Categories of ACEs, No. | N             | Hospital-ized with lung cancer | Risk**       | Relative risk of lung cancer* |                          |
|-------------------------|---------------|--------------------------------|--------------|-------------------------------|--------------------------|
|                         |               |                                |              | Model A<br>RR (95% CI)        | Model B<br>RR (95% CI)   |
| 0                       | 5595          | 20                             | 152.1        | 1.00 (referent)               | 1.00 (referent)          |
| 1                       | 4030          | 10                             | 103.8        | 0.73 (0.34, 1.58)             | 0.67 (0.31-1.45)         |
| 2                       | 2447          | 11                             | 195.6        | 1.48 (0.70, 3.10)             | 1.29 (0.61-2.74)         |
| 3                       | 1428          | 12                             | 574.4        | 3.10 (1.49, 6.46)             | 2.46 (1.17-5.19)         |
| 4 or 5                  | 1469          | 9                              | 433.7        | 2.55 (1.13, 5.74)             | 2.06 (0.90-4.72)         |
| 6, 7, or 8              | 396           | 2                              | 347.8        | 3.18 (0.71, 14.15)            | 2.14 (0.46-9.89)         |
|                         |               |                                |              | <i>P</i> for trend<0.001      | <i>P</i> for trend=0.007 |
| <b>Smoking status</b>   |               |                                |              |                               |                          |
| Never                   | 7808          | 7                              | 58.8         | 1.00 (referent)               |                          |
| Former                  | 6281          | 37                             | 225.4        | 4.44 ( 1.95-10.12)            |                          |
| Current,<20 cig/d       | 772           | 6                              | 591.4        | 10.27 ( 3.39-31.13)           |                          |
| Current,≥20 cig/d       | 504           | 14                             | 1662.8       | 26.97 (10.39-69.98)           |                          |
| <b>Total</b>            | <b>15,365</b> | <b>64</b>                      | <b>201.3</b> |                               |                          |

ACEs, adverse childhood experiences RR, risk ratio CI, confidence interval

\* Hospital discharge diagnosis of lung cancer defined by ICD-9 code 162

\*\* Risk (per 100,000 population) age-standardized to the 2000 Census population for California

Model A adjusted for age, sex, race/ethnicity, education, marital status, financial problems

Model B adjusted for age, sex, race/ethnicity, education, marital status, financial problems, smoking status, parental smoking history

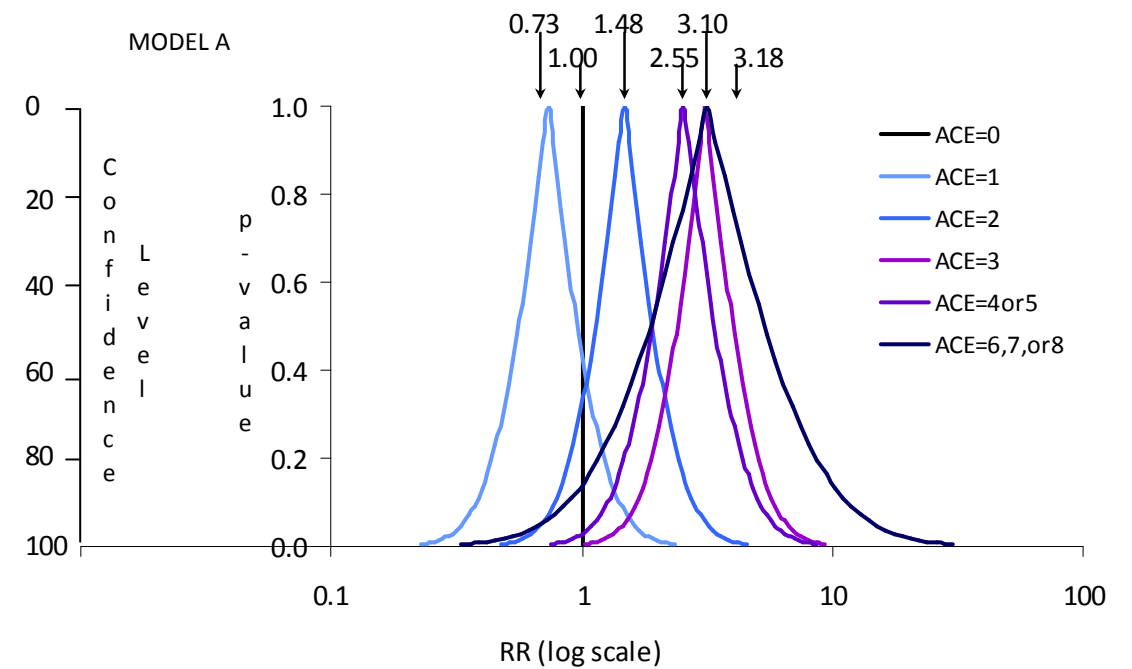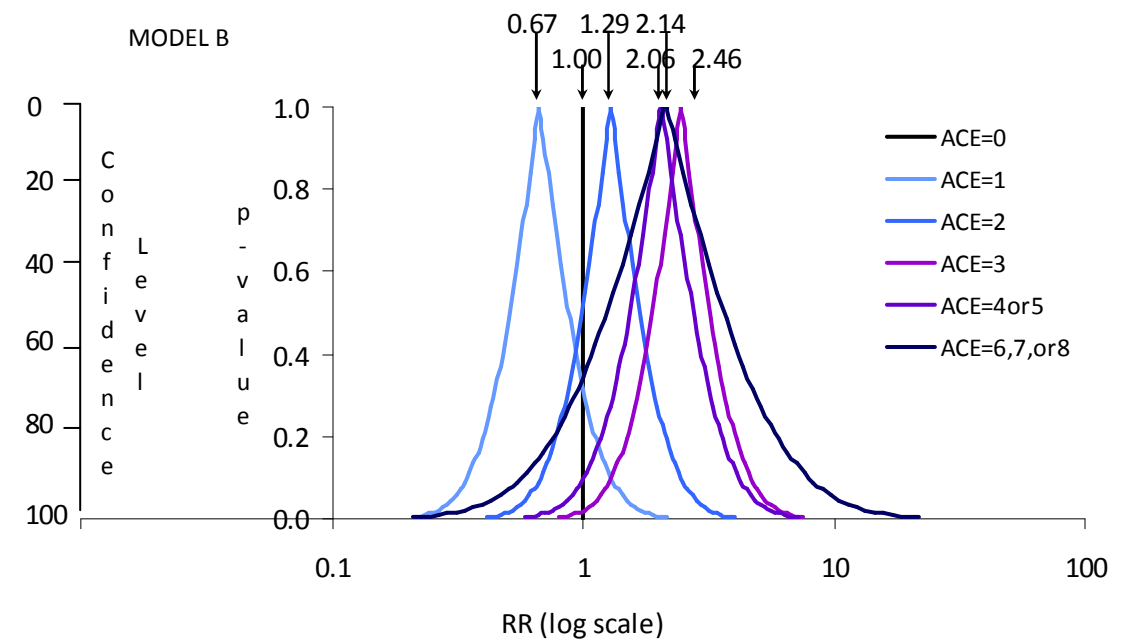

Supplement: 12889_2009_1931_MOESM3_ESM.pdf [file 12889_2009_1931_MOESM3_ESM.pdf]
