# Supplementary material for: Adverse childhood experiences are associated with the risk of lung cancer: a prospective cohort study
Source: Springer Nature journal article supplement (doi:10.1186/1471-2458-10-20), 2010-01-19

**Figure 4. Frequency, age-adjusted risk, and risk ratio of the occurrence of lung cancer, identified by death records, between baseline and 31 December 2005 by number of categories of adverse childhood experiences (ACEs) and smoking status among 16,901 adults. Confidence interval functions displayed for the risk ratio comparing the occurrence of lung cancer across the number of categories of ACEs**

| Categories of ACEs, No. | N   Person-Time (yrs)   | Deaths   Mortality Rate** | Relative risk of lung cancer* |                          |
|-------------------------|-------------------------|---------------------------|-------------------------------|--------------------------|
|                         |                         |                           | Model A<br>RR (95% CI)        | Model B<br>RR (95% CI)   |
| 0                       | 6124   44,592           | 44   26.0                 | 1.00 (referent)               | 1.00 (referent)          |
| 1                       | 4411   31,709           | 22   19.3                 | 0.80 (0.48-1.34)              | 0.74 (0.44, 1.23)        |
| 2                       | 2681   19,045           | 22   66.4                 | 1.48 (0.89-2.49)              | 1.30 (0.77, 2.18)        |
| 3                       | 1599   11,056           | 11   51.3                 | 1.52 (0.78-2.96)              | 1.17 (0.59, 2.29)        |
| 4 or 5                  | 1637   11,259           | 8   30.0                  | 1.32 (0.61-2.83)              | 1.00 (0.46, 2.16)        |
| 6, 7, or 8              | 449   2901              | 4   62.7                  | 3.55 (1.25-10.09)             | 2.34 (0.81, 6.75)        |
|                         |                         |                           | <i>P</i> for trend=0.025      | <i>P</i> for trend=0.251 |
| <b>Smoking status</b>   |                         |                           |                               |                          |
| Never                   | 8589   61,713           | 11   8.5                  |                               | 1.00 (referent)          |
| Former                  | 6879   49,379           | 73   58.0                 |                               | 5.92 (3.10-11.30)        |
| Current,<20 cig/d       | 870   5748              | 10   129.7                |                               | 12.43 (5.23-29.57)       |
| Current,≥20 cig/d       | 563   3722              | 17   357.1                |                               | 28.15 (12.77-62.08)      |
| <b>Total</b>            | <b>16,901   120,562</b> | <b>111   31.1</b>         |                               |                          |

Average follow-up time = 7.13 years; sd=2.92 years

ACEs, adverse childhood experiences RR, risk ratio CI, confidence interval

\*\* Underlying cause of death from lung cancer defined by ICD-9 code 162 for deaths between 1995-1998; ICD-10 code C34 for deaths between 1999 and 2005.

\*\* Rate (per 100,000 person-years) age-standardized to the 2000 Census population for California.

Model A adjusted for age, sex, race/ethnicity, education, marital status, financial problems

Model B adjusted for age, sex, race/ethnicity, education, marital status, financial problems, smoking status, parental smoking history

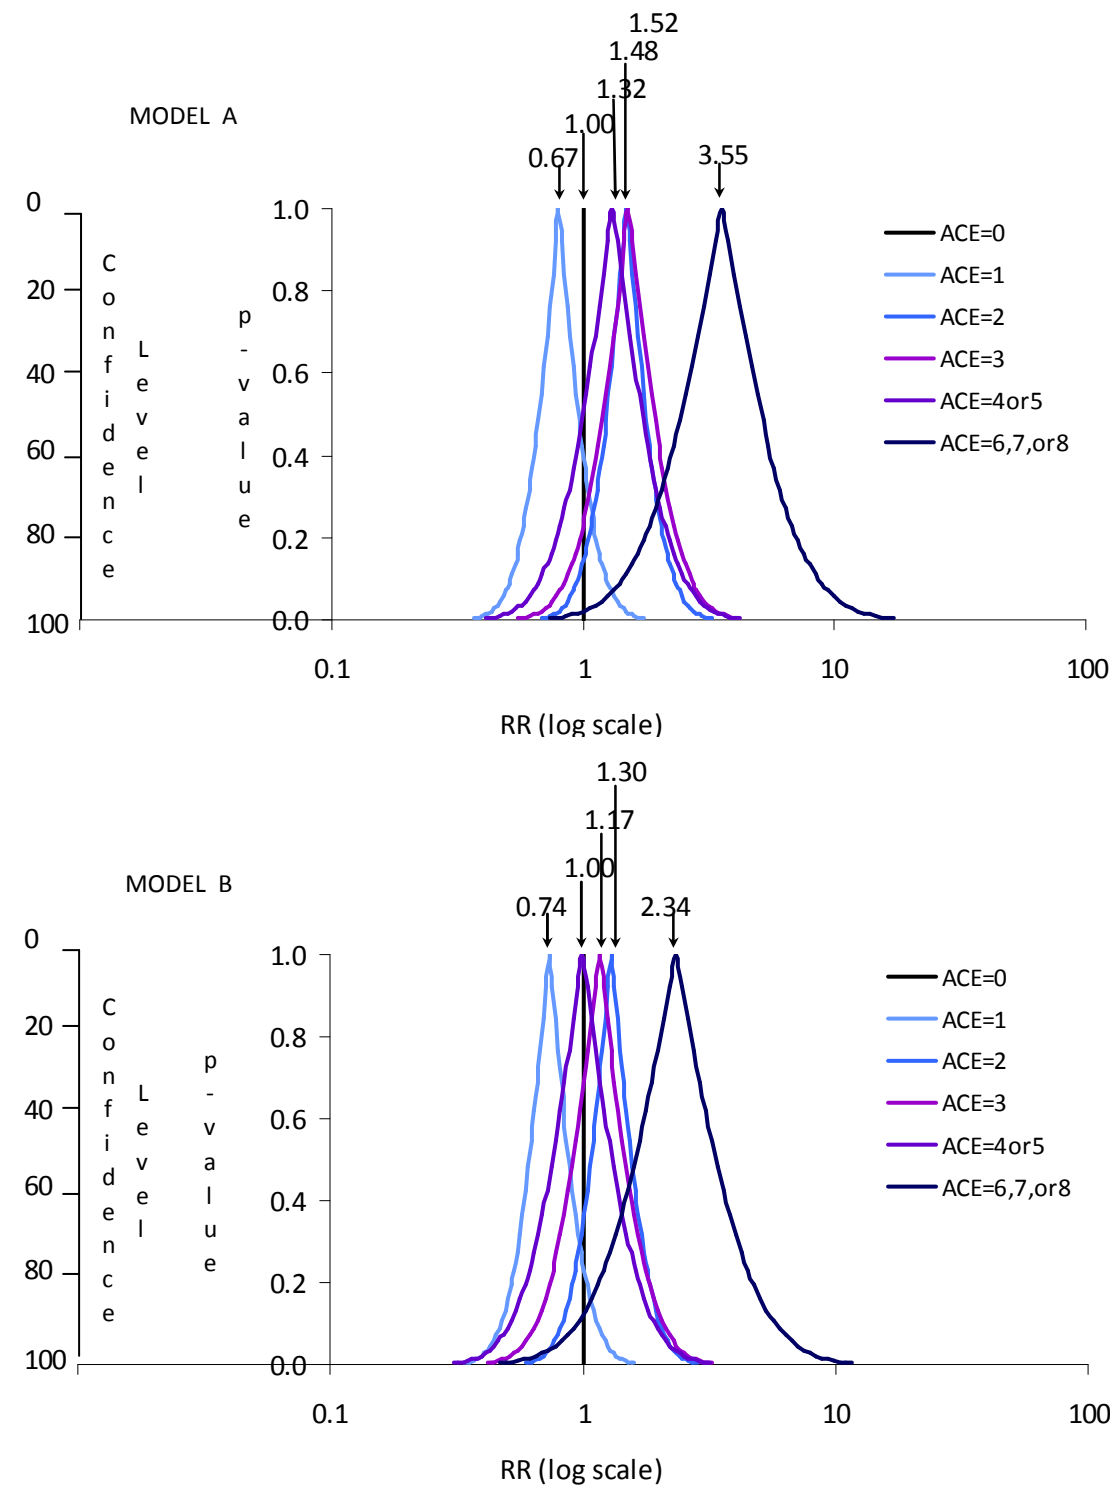

Supplement: 12889_2009_1931_MOESM5_ESM.pdf [file 12889_2009_1931_MOESM5_ESM.pdf]
