# Supplementary material for: Adverse childhood experiences are associated with the risk of lung cancer: a prospective cohort study
Source: Springer Nature journal article supplement (doi:10.1186/1471-2458-10-20), 2010-01-19

**Figure 5. Frequency, age-adjusted risk, and risk ratio of the occurrence of lung cancer, identified by hospital or death records, between baseline and 31 December 2005 by number of categories of adverse childhood experiences (ACEs) and smoking status among 16,901 adults. Confidence interval functions displayed for the risk ratio comparing the occurrence of lung cancer across the number of categories of ACEs**

| Categories of ACEs, No. | N             | Cases      | Age-adjusted risk (95% CI)** | Relative risk of lung cancer* |                          |
|-------------------------|---------------|------------|------------------------------|-------------------------------|--------------------------|
|                         |               |            |                              | Model A RR (95% CI)           | Model B RR (95% CI)      |
| 0                       | 6124          | 53         | 359.4 (268.7-480.6)          | 1.00 (referent)               | 1.00 (referent)          |
| 1                       | 4411          | 26         | 248.8 (168.9-366.3)          | 0.75 (0.47, 1.20)             | 0.69 (0.43, 1.11)        |
| 2                       | 2681          | 28         | 720.5 (394.8-1311.0)         | 1.52 (0.95, 2.42)             | 1.35 (0.84, 2.16)        |
| 3                       | 1599          | 18         | 805.5 (492.8-1313.9)         | 1.92 (1.11, 3.33)             | 1.58 (0.90, 2.76)        |
| 4 or 5                  | 1637          | 15         | 641.0 (373.9-1096.6)         | 1.88 (1.04, 3.41)             | 1.51 (0.83, 2.78)        |
| 6, 7, or 8              | 449           | 4          | 635.8 (239.5-1676.8)         | 2.70 (0.94, 7.72)             | 1.83 (0.63, 5.35)        |
|                         |               |            |                              | <i>P</i> for trend=0.001      | <i>P</i> for trend=0.017 |
| <b>Smoking status</b>   |               |            |                              |                               |                          |
| Never                   | 8589          | 16         | 108.4 (64.9-179.8)           | 1.00 (referent)               |                          |
| Former                  | 6879          | 90         | 539.6 (426.0-683.2)          | 4.83 (2.80-8.33)              |                          |
| Current, <20 cig/d      | 870           | 13         | 1166.8 (676.2-2006.2)        | 10.11 (4.78-21.39)            |                          |
| Current, ≥20 cig/d      | 563           | 25         | 3448.5 (2210.2-5342.7)       | 25.48 (13.10-49.56)           |                          |
| <b>Total</b>            | <b>16,901</b> | <b>144</b> | <b>432.3 (362.2-515.7)</b>   |                               |                          |

ACEs, adverse childhood experiences RR, risk ratio CI, confidence interval

\* Lung cancer cases identified through either a hospital discharge diagnosis of lung cancer defined by ICD-9 code 162 or an underlying cause of death from lung cancer defined by ICD-9 code 162 for deaths between 1995-1998; ICD-10 code C34 for deaths between 1999 and 2005.

\*\* Rate (per 100,000 population) age-standardized to the 2000 Census population for California.

Model A adjusted for age, sex, race/ethnicity, education, married, financial problems

Model B adjusted for age, sex, race/ethnicity, education, married, financial problems, smoking status, parental smoking history

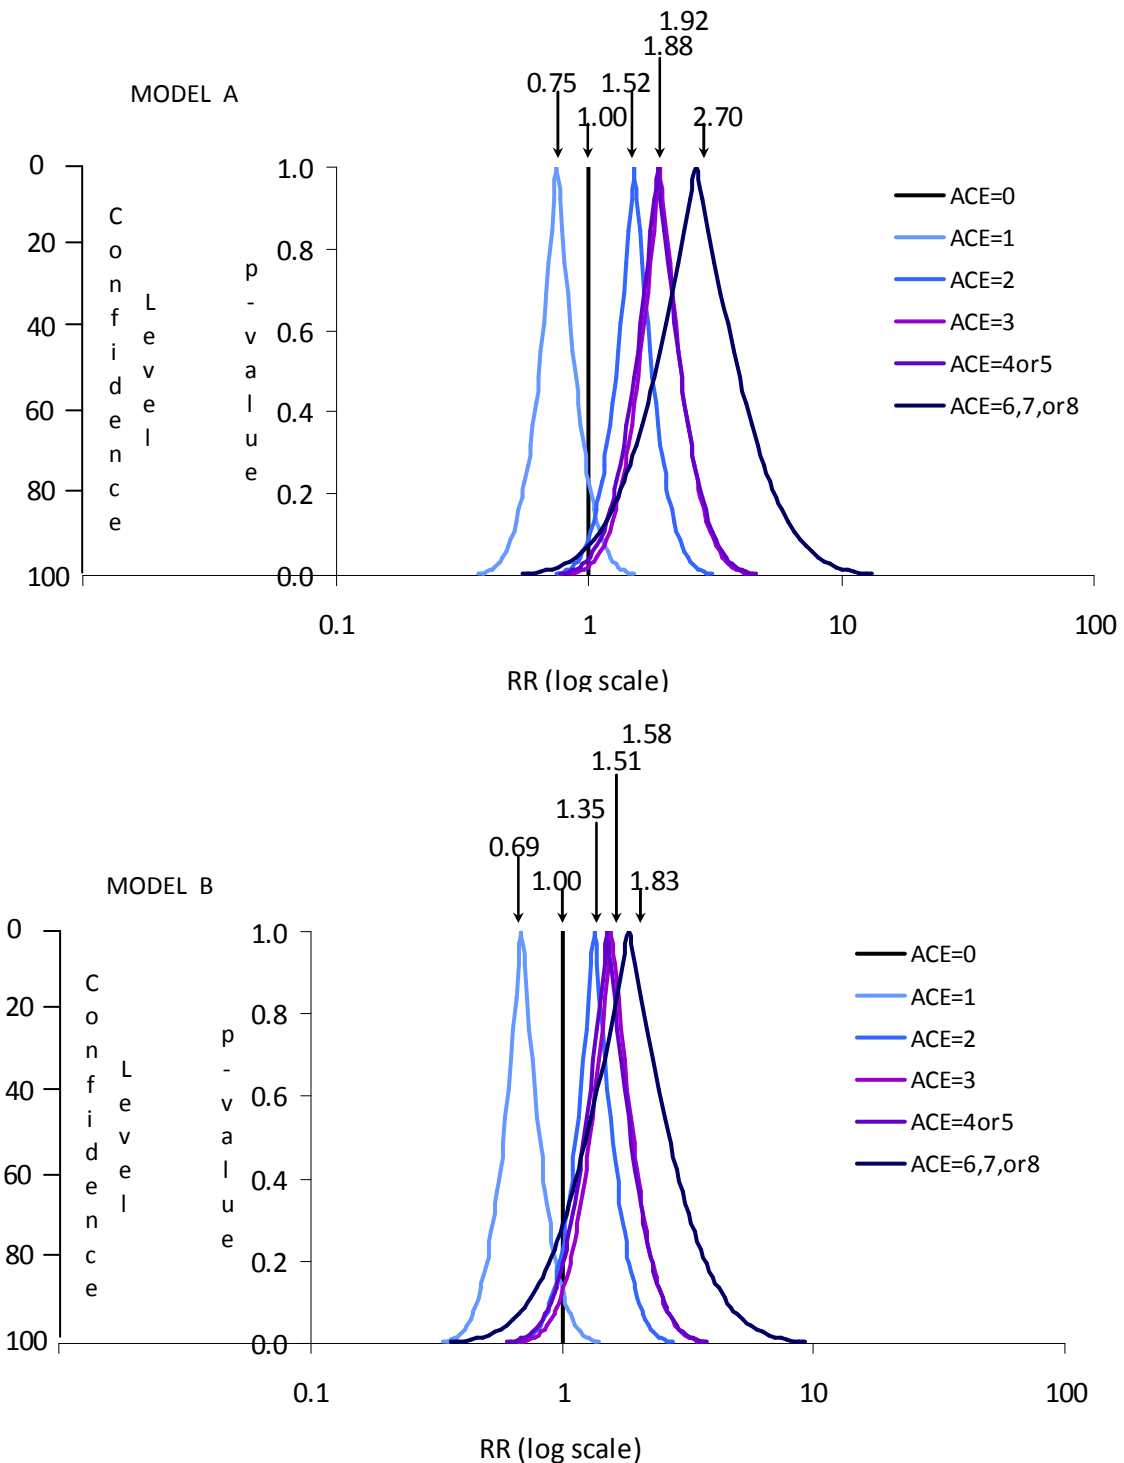

Supplement: 12889_2009_1931_MOESM6_ESM.pdf [file 12889_2009_1931_MOESM6_ESM.pdf]
