# Supplementary material for: Adverse childhood experiences are associated with the risk of lung cancer: a prospective cohort study
Source: Springer Nature journal article supplement (doi:10.1186/1471-2458-10-20), 2010-01-19
Supplement: 12889_2009_1931_MOESM2_ESM.pdf [file 12889_2009_1931_MOESM2_ESM.pdf]

Baseline survey  
(n=17,337)

Currently enrolled in Kaiser HMO on  
31 December 2005

Assumed Alive (n=10,542)

Not currently enrolled in Kaiser HMO  
31 December 2005

Eligible for NDI search (n=6795)

Non-matching records (n=2688)

Possible matching records (n=4107)

*2567 records determined to not match*

Probable matches  
(n=1179)

Possible matches  
(n=361)

Assumed alive  
(n=5255)

*Exclude deaths after  
31 December 2005*

Probable matches  
(n=1150)

Possible matches  
(n=328)

Assumed alive  
(n=5255)

*Exclude deaths  
before baseline  
appointment date*

Probable matches  
(n=1150)

Possible matches  
(n=327)

Assumed alive  
(n=5255)

Probable / possible deaths (n=1477)

Assumed alive (n=15,860)

**Final data for mortality study**

Probable / possible deaths (n=1477)

Assumed alive (n=15,424)

*Exclude  
observations  
without eligible  
follow-up time*
