# Supplementary material for: Adverse childhood experiences are associated with the risk of lung cancer: a prospective cohort study
Source: Springer Nature journal article supplement (doi:10.1186/1471-2458-10-20), 2010-01-19
Supplement: 12889_2009_1931_MOESM4_ESM.pdf [file 12889_2009_1931_MOESM4_ESM.pdf]

Figure 3. Adjusted\* mean age at hospitalization with lung cancer and adjusted mean age at death from lung cancer by number of categories of adverse childhood experiences (ACEs)

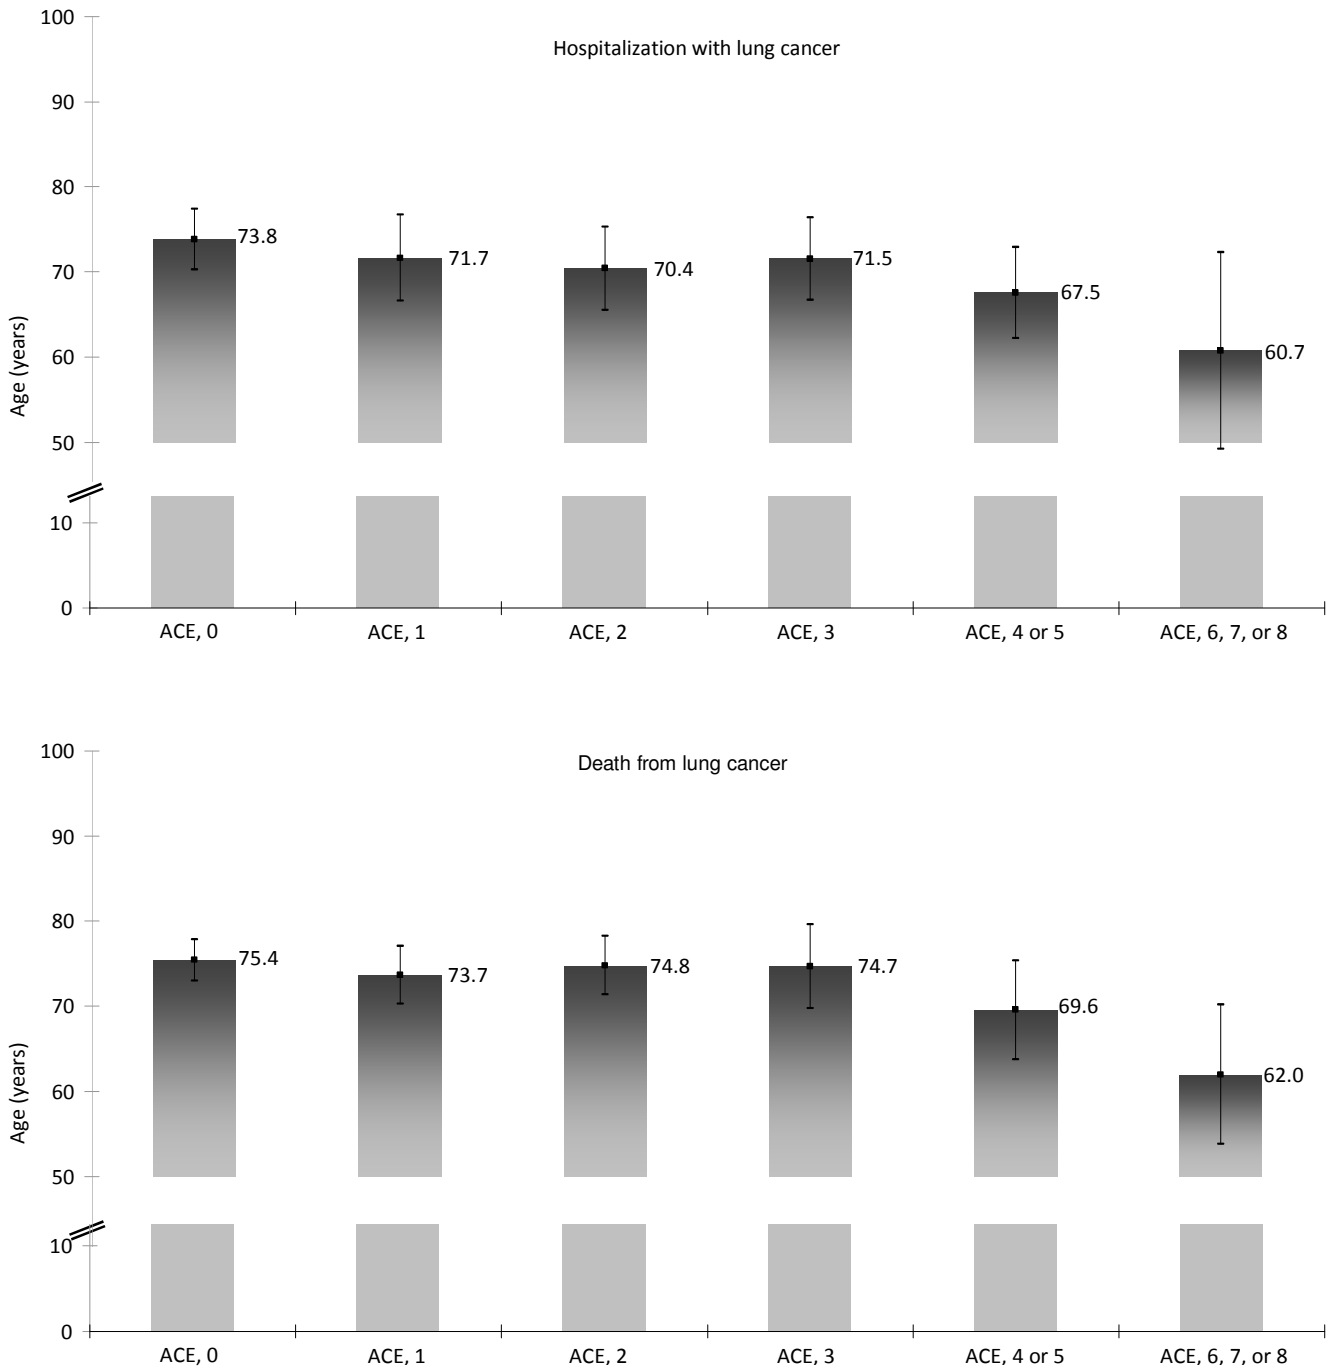

\*Adjusted for sex, race/ethnicity, education, marital status, financial problems.
